# Supplementary material for: Sequencing of Candidate Chromosome Instability Genes in Endometrial Cancers Reveals Somatic Mutations in ESCO1, CHTF18, and MRE11A
Source: PLoS One. 2013 Jun 3;8(6):e63313. doi: 10.1371/journal.pone.0063313 (PMC3670891; doi:10.1371/journal.pone.0063313)
Supplement: Table S1 — RT-PCR primers used to assess the expression of 21 candidate human chromosomal instability genes. (XLSX) [file pone.0063313.s008.xlsx]

## Sheet: Sheet1
Table S1. RT-PCR primers used to assess the expression of 21 candidate human chromosomal instability genes
Human gene symbol	Human mRNA Accession	Forward	Reverse
CCDC88A	NM_018084.3	5'-TCTCAACTGCCGAAGGAACT-3'	5'-TGTTGCTCCCTAGACCTGCT-3'
CHTF18	NM_022092.1	5'-CTTCTCGGTGTGGCAGGA-3'	5'-CAGCAGGAGTGTGTCAGCAG-3'
CHTF8	NM_001039690	5'-CAGCACTGGATTAGCTGGAAA-3'	5'-CACGATCAGCACAGGGATT-3'
DDX11	NM_030653.2	5'-TCATCTGCAGCGGGATCT-3'	5'-CACCGCACAGGTTACAGAGA-3'
DSCC1	NM_024094.1	5'-AGGAACTCGGACCATTGGA-3'	5'-TTCCCATAACATTTAAGACAGTGTTC-3'
ESCO1	NM_052911.1	5'-CCTGGTGCTGCTCAACATTA-3'	5'-TGCAAACAGCTTTCCATCAG-3'
LEO1	NM_138792.2	5'-AGAAGAACGTTTGAGGGCTTC-3'	5'-AGATTCTGGCTCGTTCCTCTC-3'
MRE11A	NM_005591	5'-GCCTTCCCGAAATGTCACTA-3'	5'-TTCAAAATCAACCCCTTTCG-3'
NIPBL	NM_015384.3	5'-GACTTCCTGCGGAGTGACAT-3'	5'-GCTTTGTTCCGAGCATTTGT-3'
PDS5A	NM_015200	5'-TCAAATTTTTAGAAATACAGGTCACAA-3'	5'-CCCCTCTTTGCTTTTTGATG-3'
PDS5B	NM_015032.1	5'-AAAAGCAAACAGCACCGAGT-3'	5'-GCGTCCTACACGGACATTTT-3'
REC8L1	NM_001048205.1	5'-GATCCCTCCTGAAGTTCCTACA-3'	5'-CAGCACAGTGACCGGAATC-3'
SGOL1	NM_001012409.1	5'-TCTGGAATGGACCCCAATAG-3'	5'-TGCTGGGCTTGCTTTATTCT-3'
SMC1A	NM_006306.2	5'-CGACATCTAGCCCTGAATCTG-3'	5'-ATTAATGCGAGGCCCAAAGT-3'
SMC3	NM_005445.3	5'-GAATCTGAGAAAACGCTTGGA-3'	5'-TGGGGAAGTGATCCAAGTTC-3'
STAG2	NM_006603	5'-CCAACGTGAATACTACTGTTAAGGAA-3'	5'-CGCCCTCCTGACATAATCTG-3'
STAG3	NM_012447.2	5'-CACCGAGAGGTCAAGGTTCT-3'	5'-CGCTCACTGGTGGAAGAGTA-3'
TIMELESS	NM_003920.1	5'-TGAGGCTCTTCCTCAGAGACTT-3'	5'-TTCTCCCGAAGCAGGTGAT-3'
TIPIN	NM_017858.1	5'-GCAAAATTCAAAGGTAAAGGTCA-3'	5'-ATAGCCTATGTGCCCAGTGC-3'
WDHD1	NM_007086.1	5'-TCTGCAGCATCCTATTTCCA-3'	5'-ACATCTGGAACCCGGTCTTT-3'
ZC3H13	NM_015070	5'-CAAATAAATCCGAGAGAACTGAGAG-3'	5'-TGCATCATCTAACTTGGACTCG-3'
