# Supplementary material for: Sequencing of Candidate Chromosome Instability Genes in Endometrial Cancers Reveals Somatic Mutations in ESCO1, CHTF18, and MRE11A
Source: PLoS One. 2013 Jun 3;8(6):e63313. doi: 10.1371/journal.pone.0063313 (PMC3670891; doi:10.1371/journal.pone.0063313)
Supplement: Table S4 — Status of microsatellite instability, MSH6 , ESCO1 , CHTF18 , MRE11A , and ATAD5 for the 107 endometrial tumors in this study. (XLSX) [file pone.0063313.s011.xlsx]

## Sheet: Table S4
Table S4. Status of microsatellite instability (*), MSH6 (*), ESCO1, CHTF18, MRE11A, and ATAD5 (**) for the 107 endometrial tumors in this study
Tumor ID	Histology	MSI Status (*)	MSH6 mutational status (*)	ESCO1 Status	CHTF18 Status	MRE11A Status	ATAD5 Status (**)
T3	Serous	Negative	WILDTYPE	WILDTYPE	WILDTYPE	MUTANT	MUTANT
T8	Serous	Negative	Germline variant of unknown functional significance (p.I795T)	WILDTYPE	WILDTYPE	WILDTYPE	WILDTYPE
T10	Serous	Negative	WILDTYPE	WILDTYPE	WILDTYPE	WILDTYPE	WILDTYPE
T17	Serous	Negative	WILDTYPE	WILDTYPE	WILDTYPE	WILDTYPE	WILDTYPE
T23	Serous	Negative	Germline variant of unknown functional significance (p.V215I)	WILDTYPE	WILDTYPE	WILDTYPE	WILDTYPE
T25	Serous	Negative	WILDTYPE	WILDTYPE	WILDTYPE	WILDTYPE	WILDTYPE
T27	Serous	Negative	WILDTYPE	WILDTYPE	WILDTYPE	WILDTYPE	WILDTYPE
T29	Serous	Negative	WILDTYPE	WILDTYPE	WILDTYPE	WILDTYPE	WILDTYPE
T30	Serous	Negative	WILDTYPE	WILDTYPE	WILDTYPE	WILDTYPE	WILDTYPE
T33	Serous	Negative	WILDTYPE	WILDTYPE	WILDTYPE	WILDTYPE	WILDTYPE
T41	Serous	Negative	WILDTYPE	WILDTYPE	WILDTYPE	WILDTYPE	WILDTYPE
T42	Serous	Negative	WILDTYPE	WILDTYPE	WILDTYPE	WILDTYPE	WILDTYPE
T43	Serous	Negative	WILDTYPE	WILDTYPE	WILDTYPE	WILDTYPE	WILDTYPE
T44	Serous	Negative	WILDTYPE	WILDTYPE	WILDTYPE	WILDTYPE	WILDTYPE
T45	Serous	Negative	WILDTYPE	WILDTYPE	WILDTYPE	WILDTYPE	WILDTYPE
T47	Serous	Negative	WILDTYPE	WILDTYPE	WILDTYPE	WILDTYPE	WILDTYPE
T48	Serous	Negative	WILDTYPE	WILDTYPE	WILDTYPE	WILDTYPE	WILDTYPE
T49	Serous	Negative	WILDTYPE	WILDTYPE	WILDTYPE	WILDTYPE	WILDTYPE
T50	Serous	Negative	WILDTYPE	WILDTYPE	WILDTYPE	WILDTYPE	WILDTYPE
T51	Serous	Negative	WILDTYPE	WILDTYPE	WILDTYPE	WILDTYPE	MUTANT
T52	Serous	Negative	WILDTYPE	WILDTYPE	WILDTYPE	WILDTYPE	WILDTYPE
T53	Serous	Negative	WILDTYPE	WILDTYPE	WILDTYPE	WILDTYPE	WILDTYPE
T54	Serous	Negative	WILDTYPE	WILDTYPE	WILDTYPE	WILDTYPE	WILDTYPE
T55	Serous	Negative	WILDTYPE	WILDTYPE	WILDTYPE	WILDTYPE	WILDTYPE
T56	Serous	Negative	WILDTYPE	WILDTYPE	WILDTYPE	WILDTYPE	WILDTYPE
T65	Serous	Negative	WILDTYPE	WILDTYPE	WILDTYPE	WILDTYPE	WILDTYPE
T66	Serous	Negative	WILDTYPE	WILDTYPE	WILDTYPE	WILDTYPE	WILDTYPE
T67	Serous	Negative	WILDTYPE	WILDTYPE	WILDTYPE	WILDTYPE	WILDTYPE
T68	Serous	Negative	WILDTYPE	WILDTYPE	WILDTYPE	MUTANT	WILDTYPE
T69	Serous	Negative	WILDTYPE	WILDTYPE	WILDTYPE	WILDTYPE	WILDTYPE
T70	Serous	Negative	WILDTYPE	WILDTYPE	WILDTYPE	WILDTYPE	WILDTYPE
T71	Serous	Negative	WILDTYPE	WILDTYPE	WILDTYPE	WILDTYPE	WILDTYPE
T74	Serous	POSITIVE	WILDTYPE	WILDTYPE	WILDTYPE	WILDTYPE	WILDTYPE
T75	Serous	Negative	WILDTYPE	WILDTYPE	WILDTYPE	WILDTYPE	WILDTYPE
T76	Serous	Negative	WILDTYPE	WILDTYPE	WILDTYPE	WILDTYPE	WILDTYPE
T78	Serous	Negative	WILDTYPE	WILDTYPE	WILDTYPE	WILDTYPE	WILDTYPE
T79	Serous	Negative	WILDTYPE	MUTANT	MUTANT	WILDTYPE	WILDTYPE
T80	Serous	Negative	WILDTYPE	WILDTYPE	WILDTYPE	WILDTYPE	WILDTYPE
T81	Serous	Negative	WILDTYPE	WILDTYPE	WILDTYPE	WILDTYPE	WILDTYPE
T83	Serous	Not determined	WILDTYPE	WILDTYPE	WILDTYPE	WILDTYPE	WILDTYPE
T107	Serous	Negative	WILDTYPE	WILDTYPE	WILDTYPE	WILDTYPE	WILDTYPE
T108	Serous	Negative	Not determined	WILDTYPE	WILDTYPE	WILDTYPE	WILDTYPE
T109	Serous	Negative	WILDTYPE	WILDTYPE	WILDTYPE	WILDTYPE	WILDTYPE
T112	Serous	Negative	WILDTYPE	WILDTYPE	WILDTYPE	WILDTYPE	WILDTYPE
T114	Serous	Negative	WILDTYPE	WILDTYPE	WILDTYPE	WILDTYPE	WILDTYPE
T19	Clear Cell	Negative	WILDTYPE	WILDTYPE	WILDTYPE	WILDTYPE	WILDTYPE
T21	Clear Cell	Negative	WILDTYPE	WILDTYPE	WILDTYPE	WILDTYPE	WILDTYPE
T24	Clear Cell	Negative	WILDTYPE	WILDTYPE	WILDTYPE	WILDTYPE	WILDTYPE
T26	Clear Cell	Negative	WILDTYPE	WILDTYPE	WILDTYPE	WILDTYPE	WILDTYPE
T28	Clear Cell	Negative	WILDTYPE	WILDTYPE	WILDTYPE	WILDTYPE	WILDTYPE
T31	Clear Cell	Negative	WILDTYPE	WILDTYPE	WILDTYPE	WILDTYPE	WILDTYPE
T32	Clear Cell	Negative	WILDTYPE	WILDTYPE	WILDTYPE	WILDTYPE	WILDTYPE
T34	Clear Cell	Negative	Somatic mutation (p.N600D)	WILDTYPE	WILDTYPE	WILDTYPE	WILDTYPE
T46	Clear Cell	Negative	WILDTYPE	WILDTYPE	WILDTYPE	WILDTYPE	WILDTYPE
T58	Clear Cell	Negative	WILDTYPE	WILDTYPE	WILDTYPE	WILDTYPE	WILDTYPE
T59	Clear Cell	Negative	WILDTYPE	WILDTYPE	WILDTYPE	WILDTYPE	WILDTYPE
T60	Clear Cell	Negative	WILDTYPE	WILDTYPE	WILDTYPE	WILDTYPE	WILDTYPE
T61	Clear Cell	POSITIVE	WILDTYPE	WILDTYPE	WILDTYPE	WILDTYPE	WILDTYPE
T62	Clear Cell	Negative	WILDTYPE	WILDTYPE	WILDTYPE	WILDTYPE	MUTANT
T63	Clear Cell	POSITIVE	Germline variant of unknown functional significance (p.S1028X)	WILDTYPE	WILDTYPE	WILDTYPE	WILDTYPE
T64	Clear Cell	Negative	WILDTYPE	WILDTYPE	WILDTYPE	WILDTYPE	WILDTYPE
T77	Clear Cell	POSITIVE	WILDTYPE	MUTANT	WILDTYPE	WILDTYPE	WILDTYPE
T82	Clear Cell	Negative	WILDTYPE	WILDTYPE	WILDTYPE	WILDTYPE	WILDTYPE
T110	Clear Cell	Negative	WILDTYPE	WILDTYPE	WILDTYPE	WILDTYPE	WILDTYPE
T113	Clear Cell	Negative	Somatic mutation (p.R1005Q)	MUTANT	WILDTYPE	WILDTYPE	MUTANT
T84	Endometrioid	Negative	WILDTYPE	WILDTYPE	WILDTYPE	WILDTYPE	WILDTYPE
T85	Endometrioid	Negative	WILDTYPE	WILDTYPE	WILDTYPE	WILDTYPE	WILDTYPE
T87	Endometrioid	Negative	WILDTYPE	WILDTYPE	WILDTYPE	WILDTYPE	WILDTYPE
T88	Endometrioid	MSI-LOW	WILDTYPE	MUTANT	MUTANT	WILDTYPE	MUTANT
T89	Endometrioid	Negative	WILDTYPE	WILDTYPE	WILDTYPE	WILDTYPE	WILDTYPE
T90	Endometrioid	Negative	WILDTYPE	WILDTYPE	WILDTYPE	WILDTYPE	WILDTYPE
T91	Endometrioid	Negative	WILDTYPE	WILDTYPE	WILDTYPE	WILDTYPE	WILDTYPE
T92	Endometrioid	Negative	WILDTYPE	WILDTYPE	WILDTYPE	WILDTYPE	WILDTYPE
T93	Endometrioid	Negative	WILDTYPE	WILDTYPE	WILDTYPE	WILDTYPE	WILDTYPE
T94	Endometrioid	Negative	Germline variant of unknown functional significance (p.K545E)	WILDTYPE	WILDTYPE	WILDTYPE	WILDTYPE
T95	Endometrioid	Negative	WILDTYPE	WILDTYPE	WILDTYPE	WILDTYPE	WILDTYPE
T96	Endometrioid	Negative	WILDTYPE	WILDTYPE	WILDTYPE	WILDTYPE	WILDTYPE
T97	Endometrioid	Negative	WILDTYPE	WILDTYPE	WILDTYPE	WILDTYPE	WILDTYPE
T99	Endometrioid	Negative	WILDTYPE	WILDTYPE	WILDTYPE	WILDTYPE	WILDTYPE
T100	Endometrioid	Negative	WILDTYPE	WILDTYPE	WILDTYPE	WILDTYPE	WILDTYPE
T101	Endometrioid	Negative	WILDTYPE	WILDTYPE	WILDTYPE	WILDTYPE	WILDTYPE
T102	Endometrioid	Negative	WILDTYPE	WILDTYPE	WILDTYPE	WILDTYPE	WILDTYPE
T103	Endometrioid	Negative	WILDTYPE	WILDTYPE	WILDTYPE	WILDTYPE	WILDTYPE
T104	Endometrioid	Negative	WILDTYPE	WILDTYPE	WILDTYPE	WILDTYPE	WILDTYPE
T105	Endometrioid	Negative	WILDTYPE	WILDTYPE	WILDTYPE	WILDTYPE	WILDTYPE
T106	Endometrioid	Negative	WILDTYPE	WILDTYPE	WILDTYPE	WILDTYPE	WILDTYPE
T115	Endometrioid	MSI-LOW	WILDTYPE	WILDTYPE	WILDTYPE	WILDTYPE	WILDTYPE
T116	Endometrioid	Negative	WILDTYPE	WILDTYPE	WILDTYPE	WILDTYPE	WILDTYPE
T117	Endometrioid	POSITIVE	WILDTYPE	WILDTYPE	WILDTYPE	WILDTYPE	WILDTYPE
T118	Endometrioid	Negative	WILDTYPE	WILDTYPE	WILDTYPE	WILDTYPE	WILDTYPE
T119	Endometrioid	POSITIVE	WILDTYPE	WILDTYPE	WILDTYPE	WILDTYPE	WILDTYPE
T120	Endometrioid	Negative	WILDTYPE	WILDTYPE	WILDTYPE	WILDTYPE	WILDTYPE
T121	Endometrioid	POSITIVE	WILDTYPE	WILDTYPE	WILDTYPE	WILDTYPE	WILDTYPE
T122	Endometrioid	POSITIVE	WILDTYPE	WILDTYPE	WILDTYPE	WILDTYPE	WILDTYPE
T123	Endometrioid	Negative	WILDTYPE	WILDTYPE	WILDTYPE	WILDTYPE	WILDTYPE
T124	Endometrioid	Negative	WILDTYPE	WILDTYPE	WILDTYPE	WILDTYPE	WILDTYPE
T125	Endometrioid	Negative	Germline variant of unknown functional significance (p.T369I)	WILDTYPE	WILDTYPE	WILDTYPE	WILDTYPE
T126	Endometrioid	POSITIVE	WILDTYPE	WILDTYPE	WILDTYPE	WILDTYPE	WILDTYPE
T127	Endometrioid	POSITIVE	WILDTYPE	WILDTYPE	WILDTYPE	WILDTYPE	WILDTYPE
T128	Endometrioid	Negative	WILDTYPE	WILDTYPE	WILDTYPE	WILDTYPE	WILDTYPE
T129	Endometrioid	MSI-LOW	WILDTYPE	WILDTYPE	WILDTYPE	WILDTYPE	WILDTYPE
T130	Endometrioid	Negative	WILDTYPE	WILDTYPE	WILDTYPE	WILDTYPE	WILDTYPE
T131	Endometrioid	Negative	WILDTYPE	WILDTYPE	WILDTYPE	WILDTYPE	WILDTYPE
T132	Endometrioid	POSITIVE	WILDTYPE	WILDTYPE	WILDTYPE	WILDTYPE	WILDTYPE
T133	Endometrioid	Negative	WILDTYPE	WILDTYPE	WILDTYPE	WILDTYPE	WILDTYPE
T134	Endometrioid	POSITIVE	WILDTYPE	WILDTYPE	WILDTYPE	WILDTYPE	WILDTYPE
T137	Endometrioid	Negative	WILDTYPE	WILDTYPE	WILDTYPE	WILDTYPE	WILDTYPE
* Previously reported in reference 52
** Previously reported in reference 44
